# Supplementary material for: Cerebrospinal Fluid Biomarkers in Differential Diagnosis of Multiple Sclerosis and Systemic Inflammatory Diseases with Central Nervous System Involvement
Source: MDPI journal article supplement (doi:10.3390/biomedicines11020425), 2023-02-01
Supplement: s1 [file s1]

# Cerebrospinal Fluid Biomarkers in Differential Diagnosis of Multiple Sclerosis and Systemic Inflammatory Diseases with Central Nervous System Involvement

Mariola Świderek-Matysiak , Magdalena Oset, Małgorzata Domowicz, Grażyna Galazka, Magdalena Namiecińska and Mariusz Stasiołek

**Table S1.** The catalog/lot number of used ELISA kits.

|           |                                  |                |                                        |
|-----------|----------------------------------|----------------|----------------------------------------|
| NF-light  | UmanDiagnostics, Sweden,<br>Umea | cat: 10-7001   | LOT: 70736, 70757, 70784,<br>70804     |
| GFAP      | EIAab, China                     | cat: E0068h    | LOT: 0D135C, 0L155C,<br>0F195C, 0I225C |
| IL6       | Biorbyt, UK                      | cat: orb50052  | LOT: B2984                             |
| IFN gamma | Biorbyt, UK                      | cat: orb50080  | LOT: B2969                             |
| CXCL13    | Biorbyt, UK                      | cat: orb890880 | LOT: CB6714                            |
| OPN       | Biorbyt, UK                      | cat: orb50093  | LOT: B3060                             |
| YKL-40    | Biorbyt, UK                      | cat: orb219580 | LOT: ER2487                            |

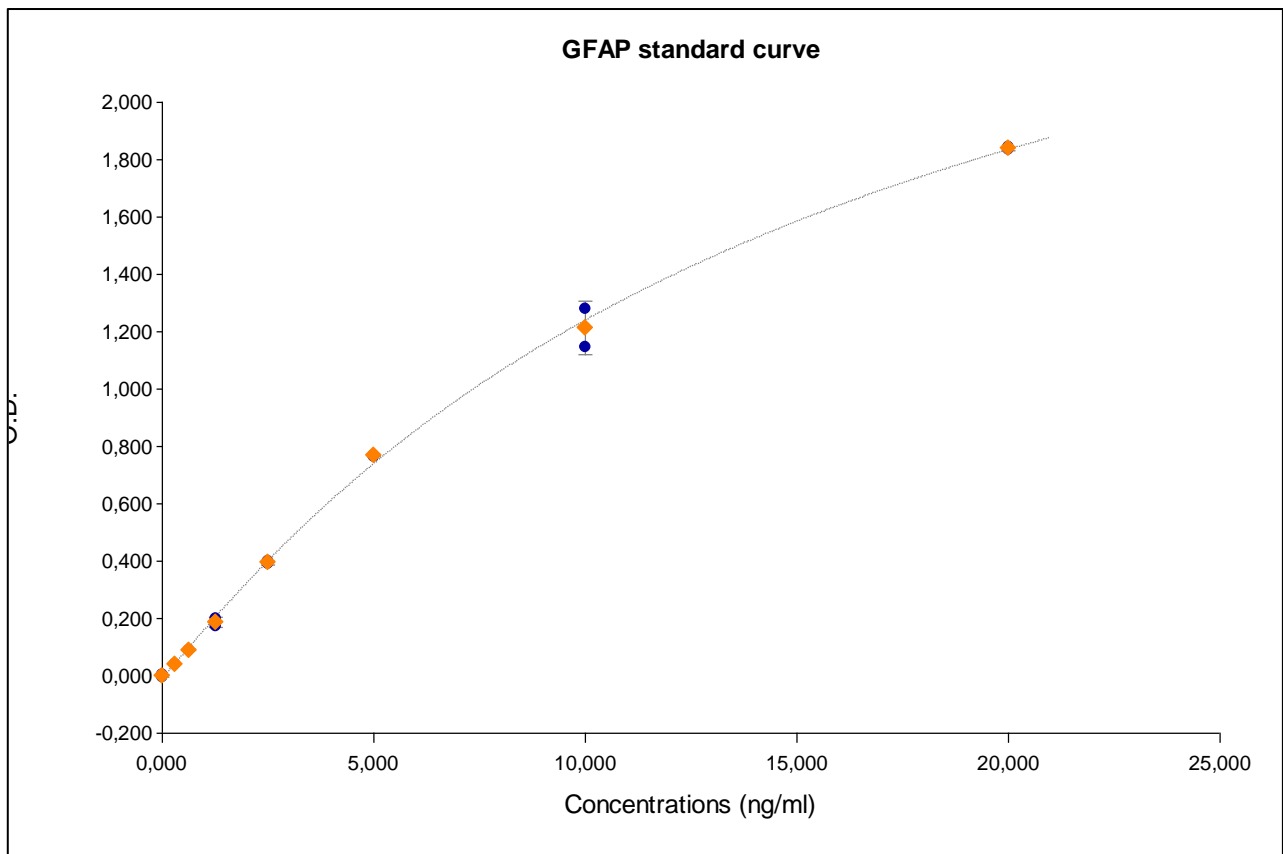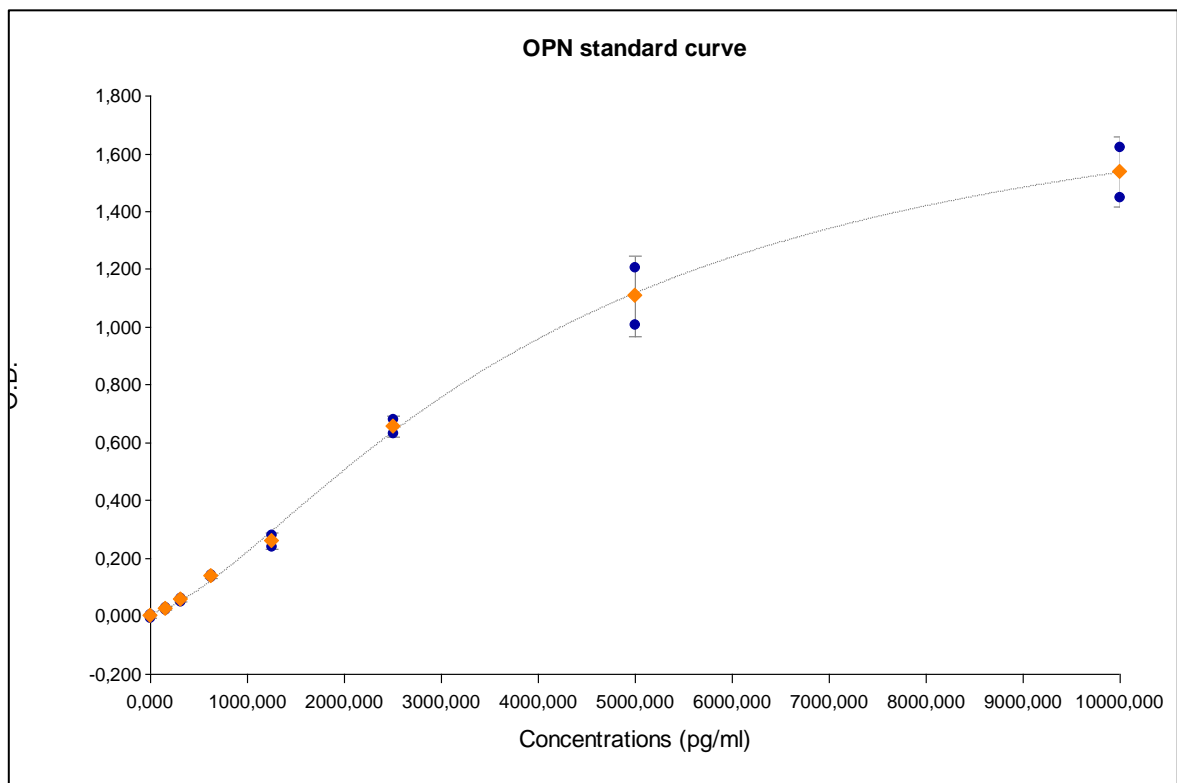

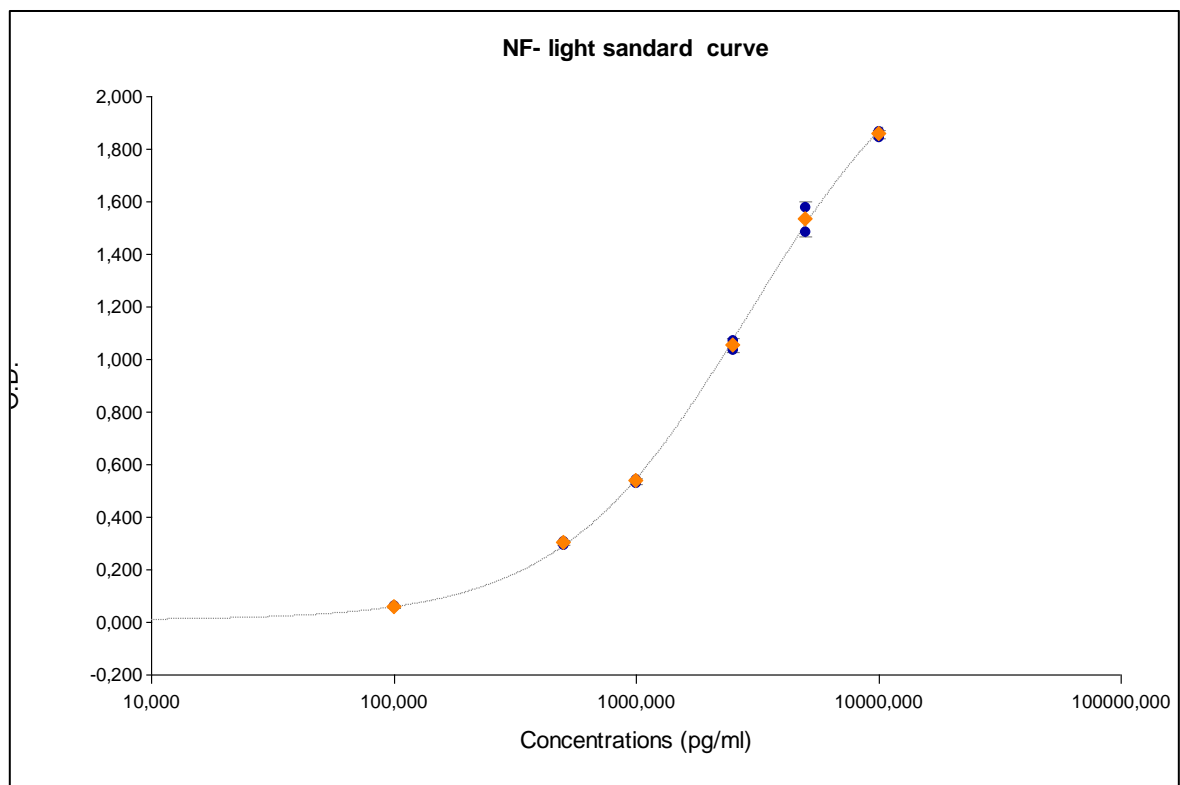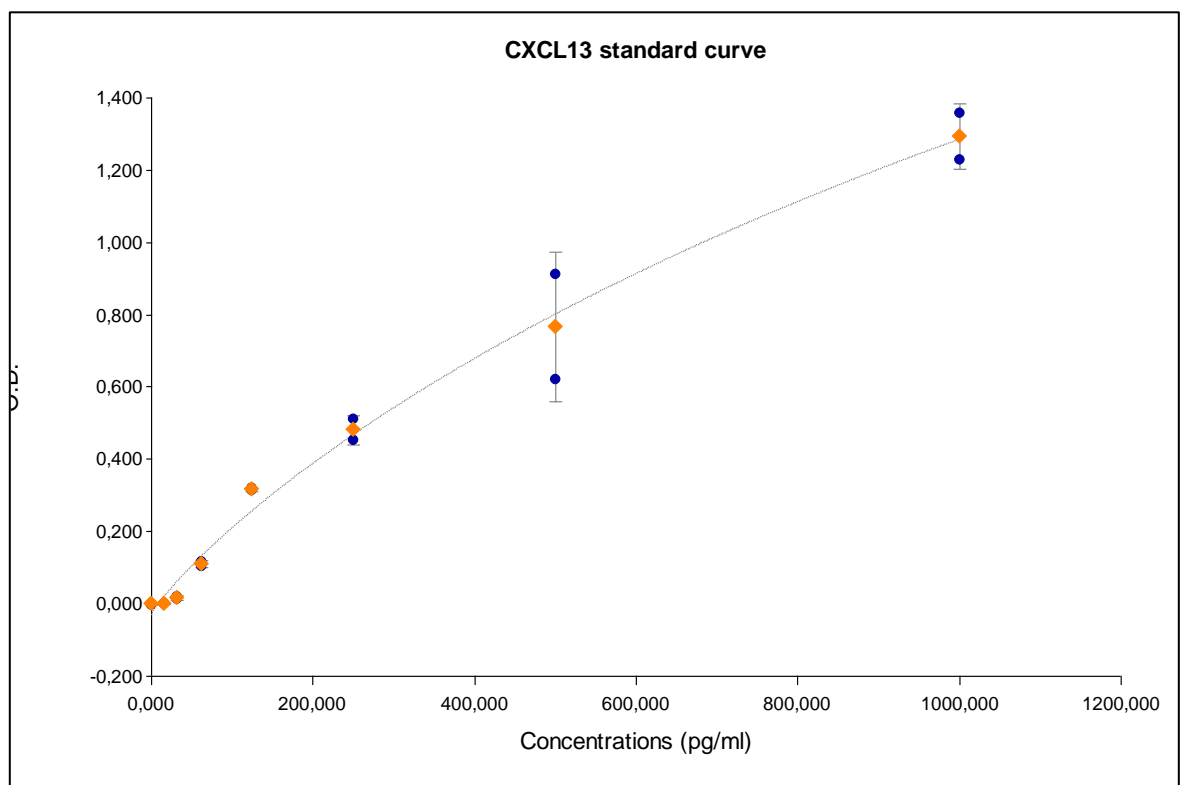

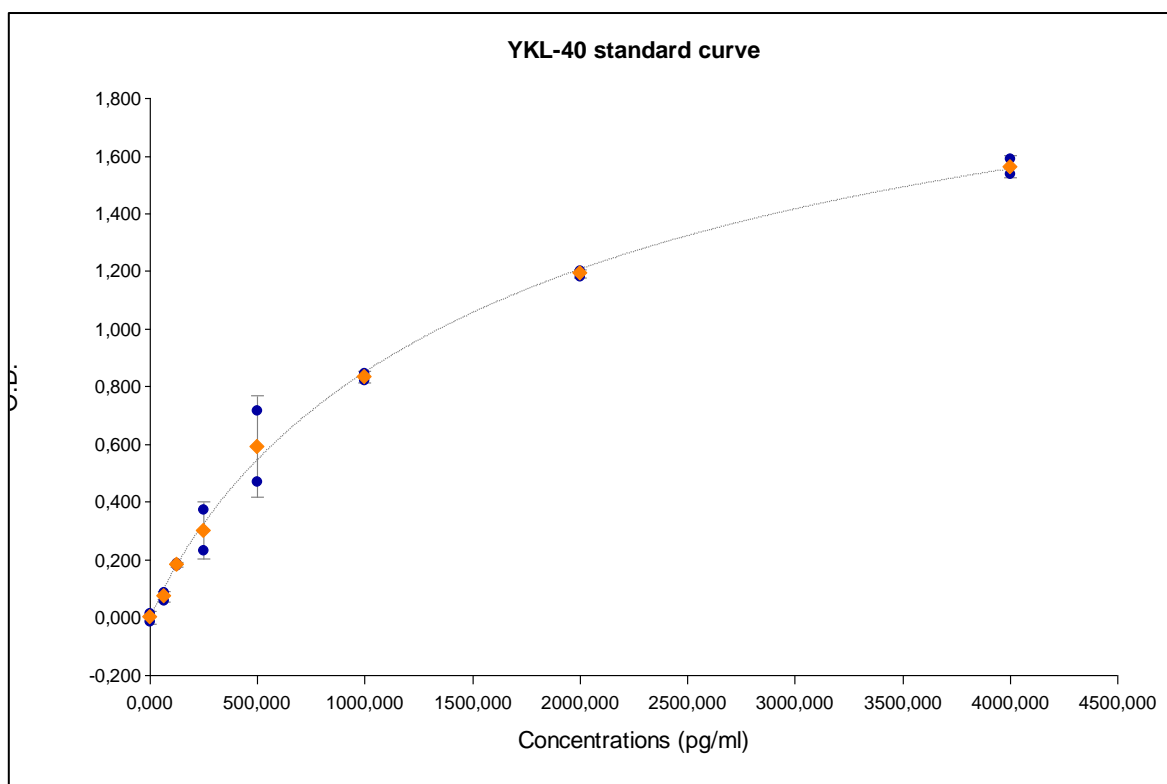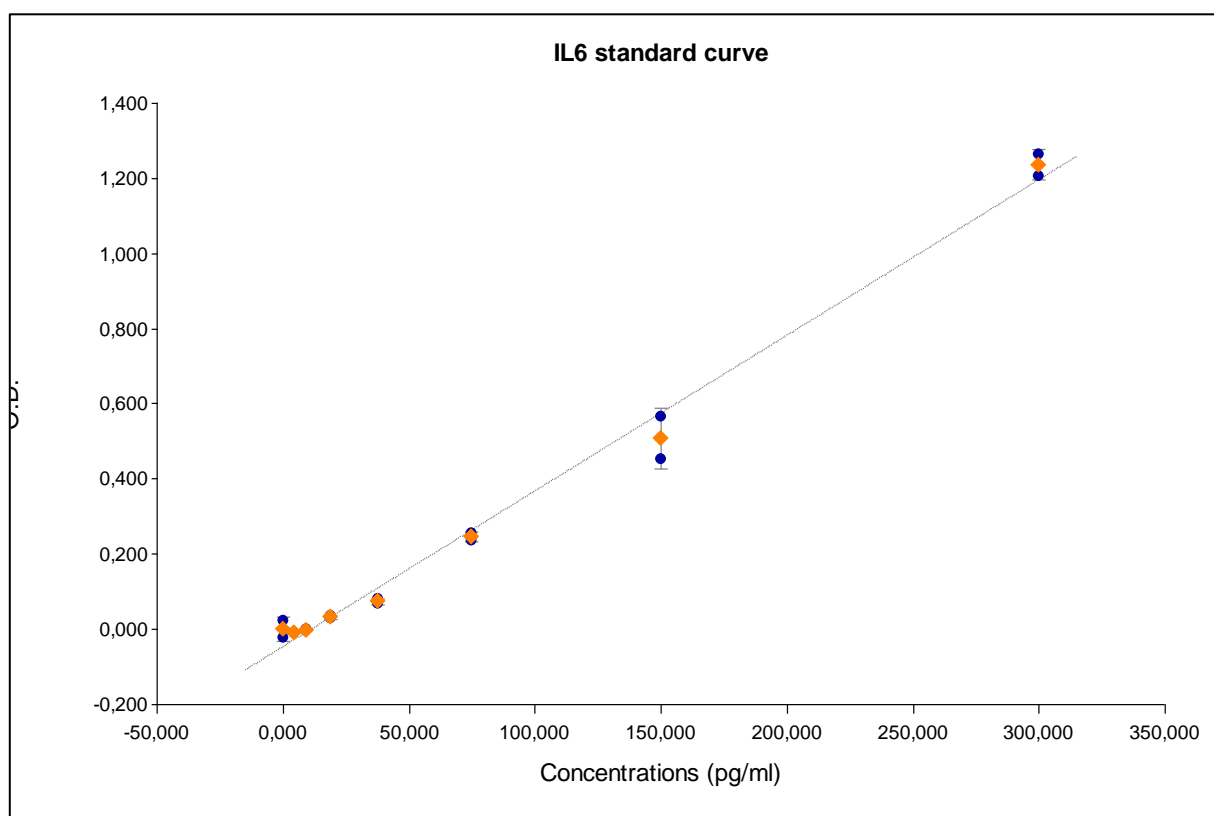

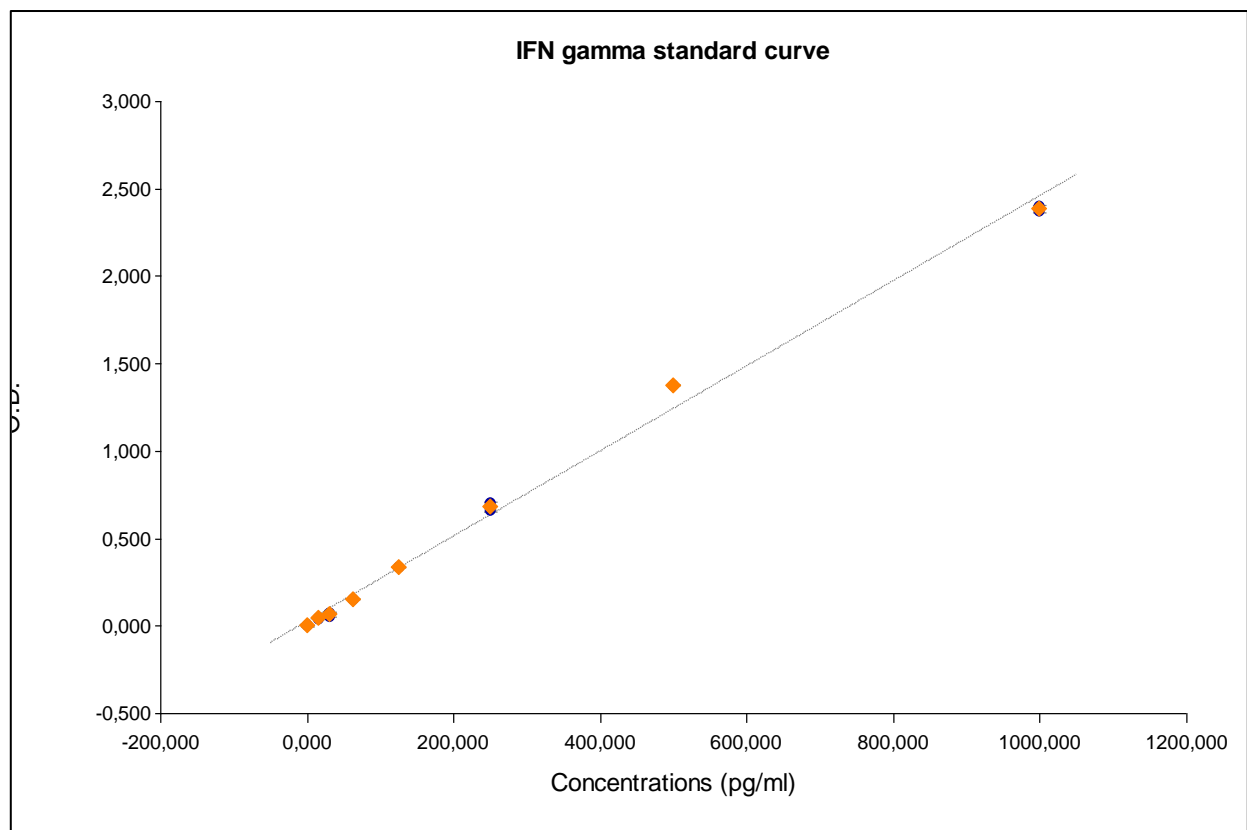

**Figure S1.** The representative standard curves of used ELISA kits.
